# Supplementary material
Source: PubMed Central journal article supplement (PMC6087489)
Supplement: NIHMS983019-supplement-Fig__S1.pdf [file NIHMS983019-supplement-Fig__S1.pdf]

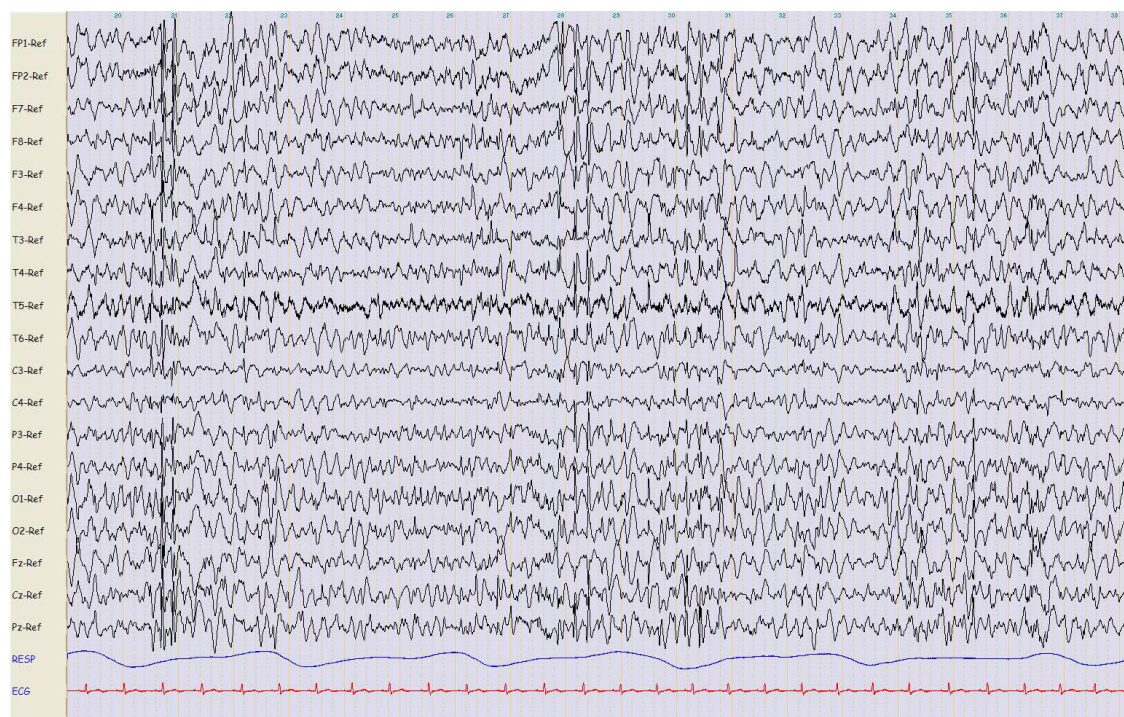

**Supplementary Fig. S1:** EEG analyses of the Y112X/N163D patient when she was 24 years old. EEGs show a slow background activity, with bilateral spike and spike and wave discharges. No aggravation of these signals was detected after 4 years (see Fig. 1A).
